# Supplementary material for: Histological diagnosis of unprocessed breast core-needle biopsy via stimulated Raman scattering microscopy and multi-instance learning
Source: PubMed Central journal article supplement (PMC10008736; doi:10.7150/thno.81784), 2023-02-21
Supplement: thnov13p1342s1.pdf [file thnov13p1342s1.pdf]

## Supplementary Material

**Table S1.** Patients' information.

| <b>Malignant (total 33 patients, 35 biopsies)</b> |                  | <b>Benign (total 26 patients, 26 biopsies)</b> |                  |
|---------------------------------------------------|------------------|------------------------------------------------|------------------|
| <b>Number</b>                                     | <b>Diagnosis</b> | <b>Number</b>                                  | <b>Diagnosis</b> |
| M01                                               | IDC              | B01                                            | FADS             |
| M02                                               | IDC              | B02                                            | FAD              |
| M03                                               | DCIS             | B03                                            | FAD              |
| M04                                               | IDC              | B04                                            | FAD              |
| M05                                               | IDC              | B05                                            | FAD              |
| M06                                               | IDC              | B06                                            | FADS             |
| M07                                               | IDC              | B07                                            | FADS             |
| M08                                               | IDC              | B08                                            | FADS             |
| M09                                               | IDC              | B09                                            | FADS             |
| M10                                               | IDC              | B10                                            | FADS             |
| M11                                               | IDC              | B11                                            | FAD              |
| M12                                               | DCIS             | B12                                            | FADS             |
| M13                                               | IDC              | B13                                            | FAD              |
| M14                                               | IDC              | B14                                            | FADS             |
| M15                                               | IDC              | B15                                            | FAD              |
| M16                                               | IDC              | B16                                            | FAD              |
| M17                                               | IDC              | B17                                            | FAD              |
| M18                                               | IDC              | B18                                            | FAD              |
| M19                                               | IDC (2 biopsies) | B19                                            | FAD              |
| M20                                               | IDC (2 biopsies) | B20                                            | FAD              |
| M21                                               | IDC              | B21                                            | SA               |
| M22                                               | IDC              | B22                                            | FAD              |
| M23                                               | DCIS             | B23                                            | FAD              |
| M24                                               | IDC              | B24                                            | FAD              |
| M25                                               | IDC              | B25                                            | FAD              |

|     |     |     |     |
|-----|-----|-----|-----|
| M26 | IDC | B26 | FAD |
| M27 | IDC |     |     |
| M28 | IDC |     |     |
| M29 | IDC |     |     |
| M30 | IDC |     |     |
| M31 | IDC |     |     |
| M32 | IDC |     |     |
| M33 | IDC |     |     |

Abbreviations:

IDC: invasive ductal carcinoma

DCIS: ductal carcinoma in situ

FAD: fibroadenoma

SA: breast sclerosing adenosis

FADS: fibroadenosis

**Table S2.** Details for the MIL-CNN model optimization procedure.

| <b>Class</b>        | <b>Value</b> |
|---------------------|--------------|
| Criteria            | Focal loss   |
| Optimizer           | Adam         |
| $\beta_1$           | 0.9          |
| $\beta_2$           | 0.999        |
| Learning rate       | 0.001        |
| Weight decay        | 0.0001       |
| Epochs              | 200          |
| Batch size          | 32           |
| Number of top tiles | 15           |

**Figure S1.** The averaging method for generating intact heatmap of SRS image. WSI size here is 1350×1350 pixels, patch size is 450×450 pixels, step size is 150 pixels.

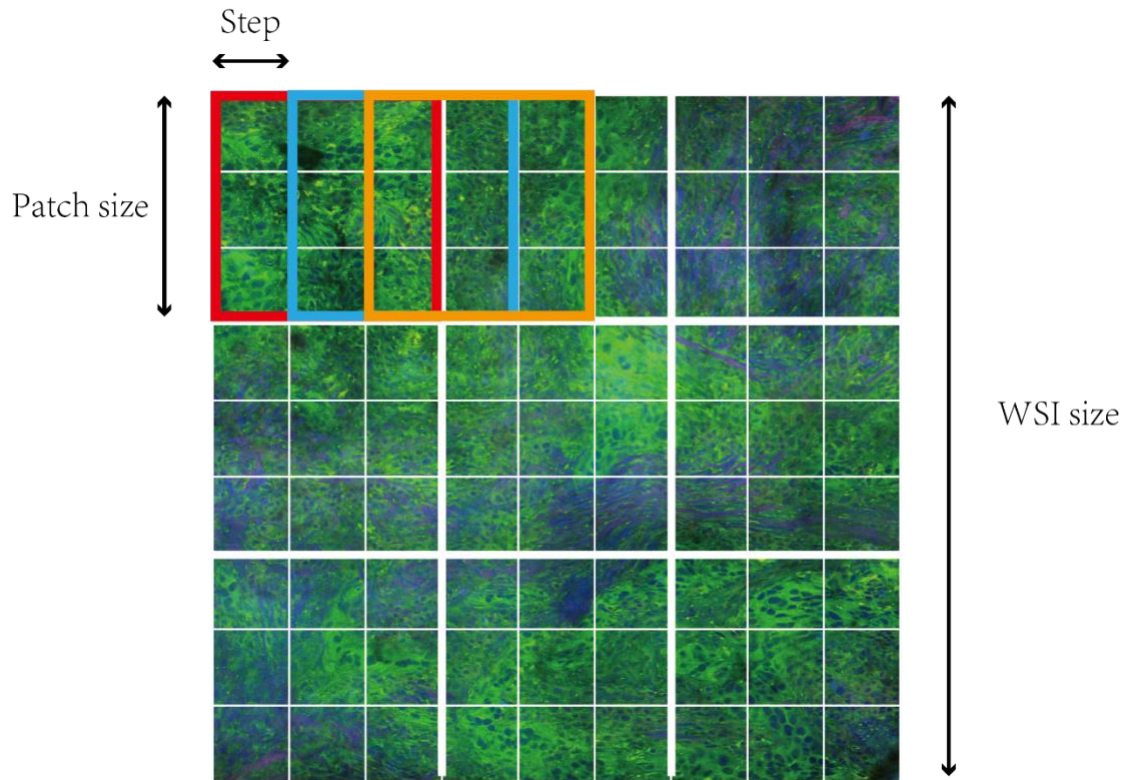

|   |   |   |   |   |   |   |   |   |
|---|---|---|---|---|---|---|---|---|
| 1 | 2 | 3 | 3 | 3 | 3 | 3 | 2 | 1 |
| 2 | 4 | 6 | 6 | 6 | 6 | 6 | 4 | 2 |
| 3 | 6 | 9 | 9 | 9 | 9 | 9 | 6 | 3 |
| 3 | 6 | 9 | 9 | 9 | 9 | 9 | 6 | 3 |
| 3 | 6 | 9 | 9 | 9 | 9 | 9 | 6 | 3 |
| 3 | 6 | 9 | 9 | 9 | 9 | 9 | 6 | 3 |
| 3 | 6 | 9 | 9 | 9 | 9 | 9 | 6 | 3 |
| 2 | 4 | 6 | 6 | 6 | 6 | 6 | 4 | 2 |
| 1 | 2 | 3 | 3 | 3 | 3 | 3 | 2 | 1 |
